# Supplementary material
Source: PubMed Central journal article supplement (PMC3338345)

**PCAD**

**MCI**

**AD**

**Parietal Ctx**

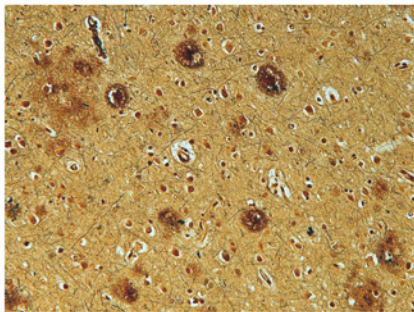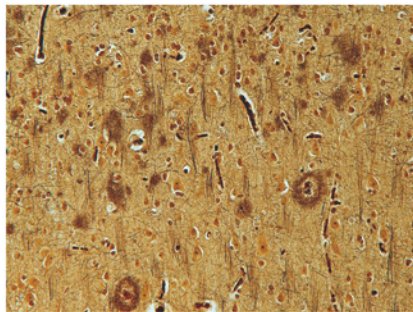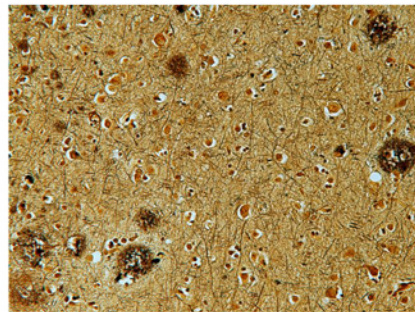

**Subiculum**

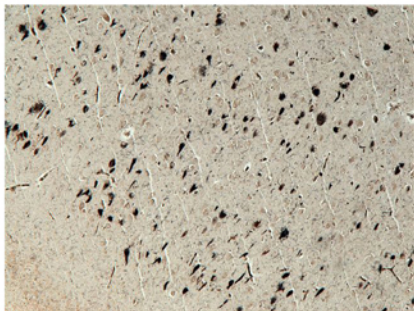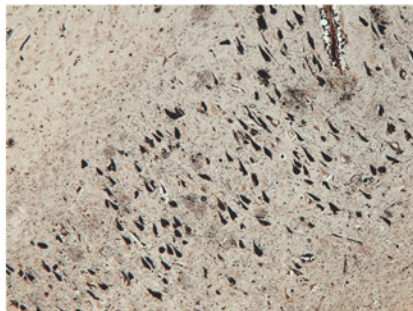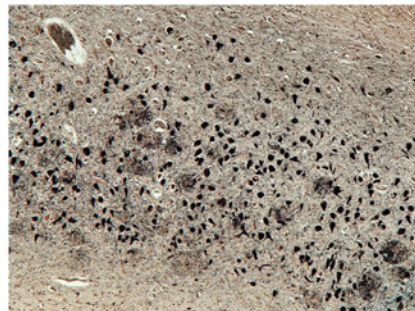

Supplement: mmc1.pdf [file mmc1.pdf]

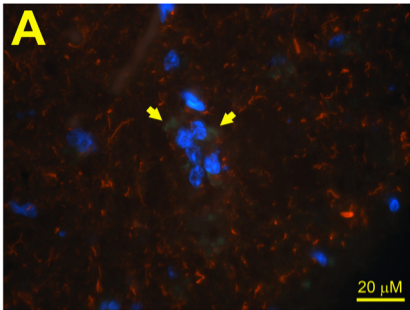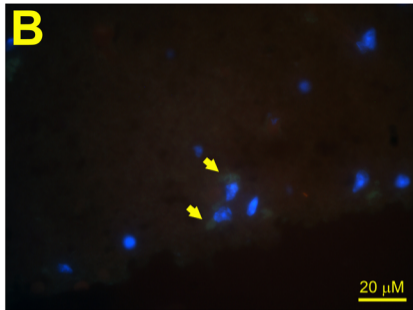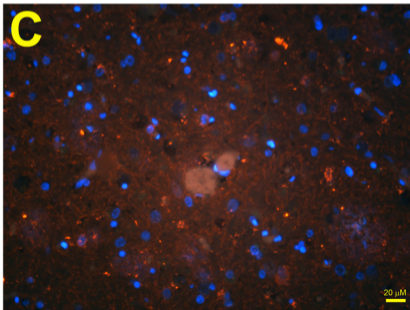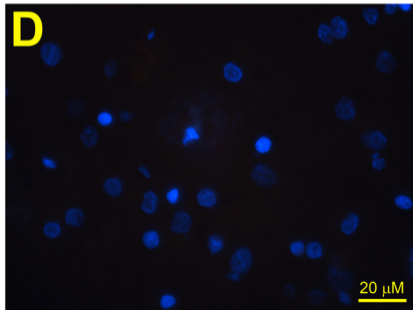

Supplement: mmc10.pdf [file mmc10.pdf]

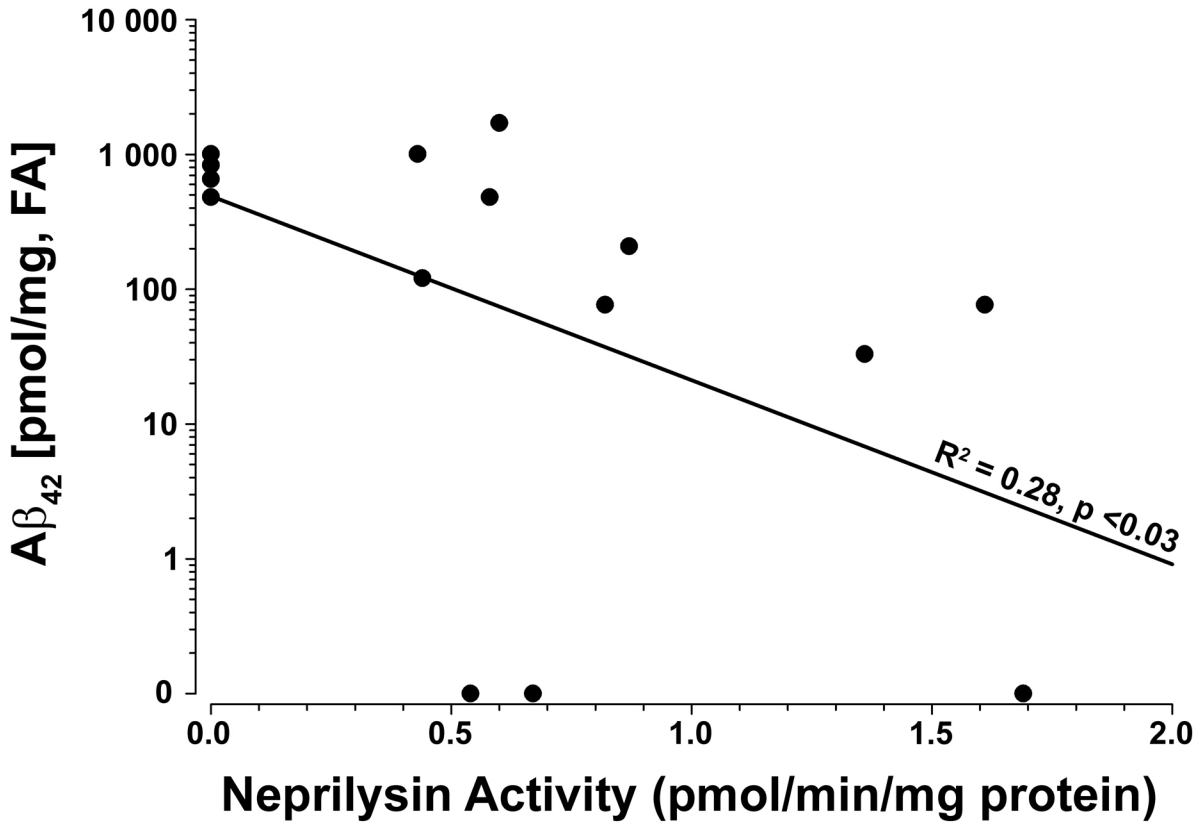

Supplement: mmc11.pdf [file mmc11.pdf]

**A**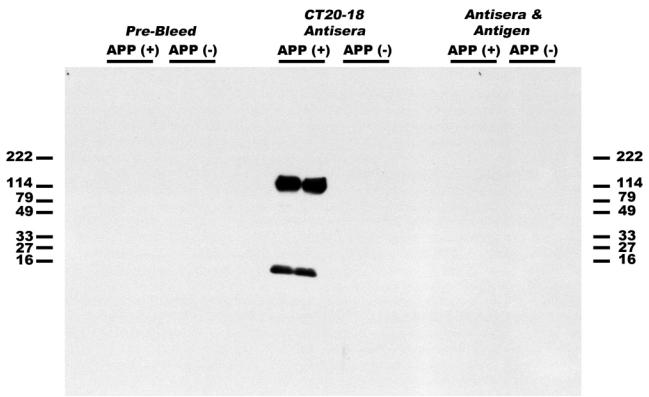**B**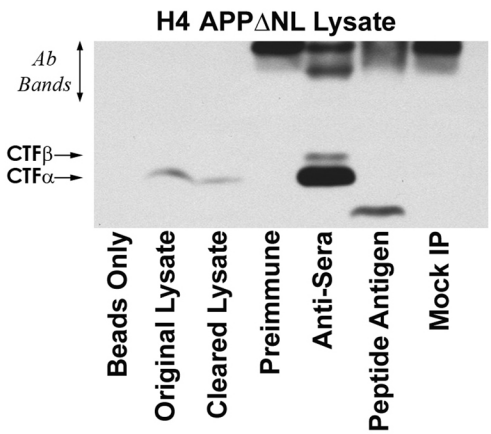

Supplement: mmc2.pdf [file mmc2.pdf]

**BACE1**

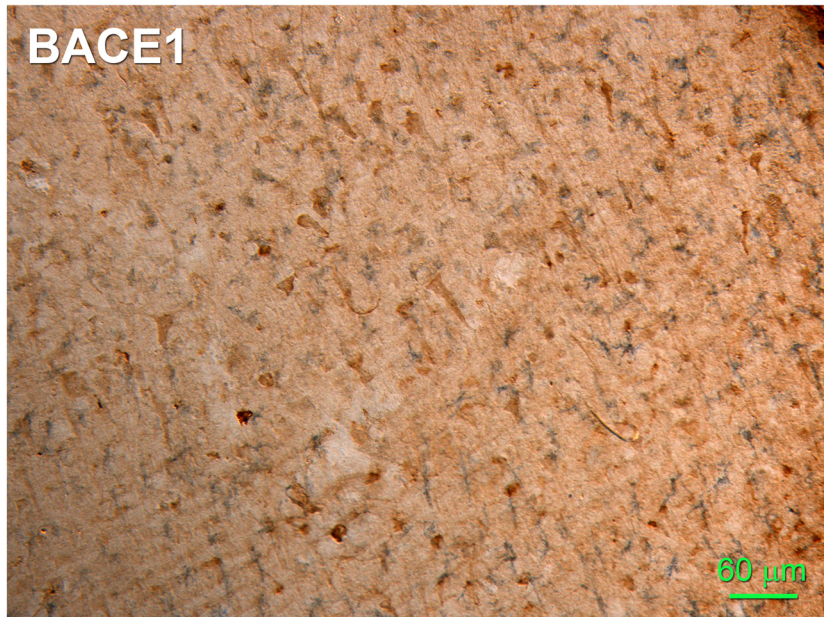

**BACE2**

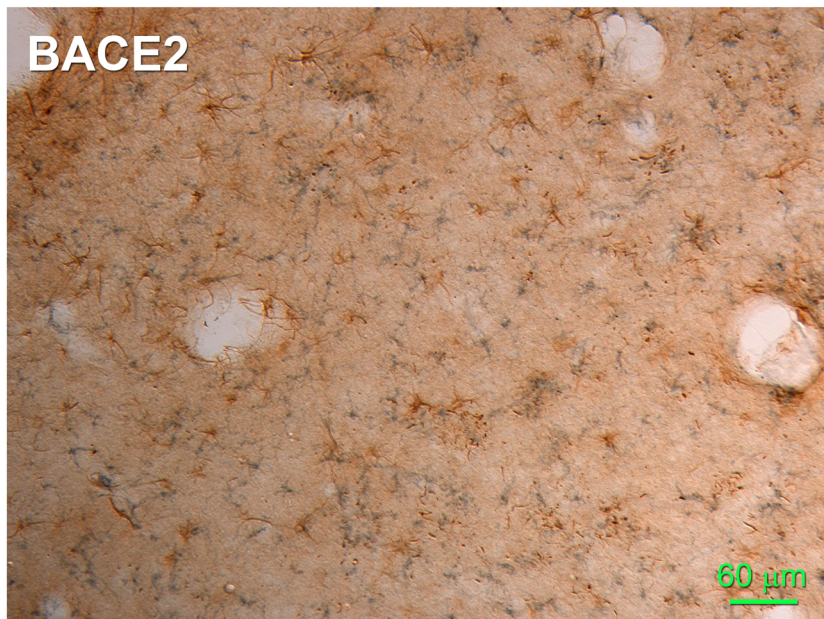

Supplement: mmc3.pdf [file mmc3.pdf]

Total A $\beta$  [pmol/mg]

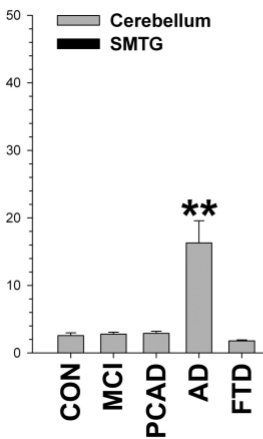

Total A $\beta$  [pmol/mg]

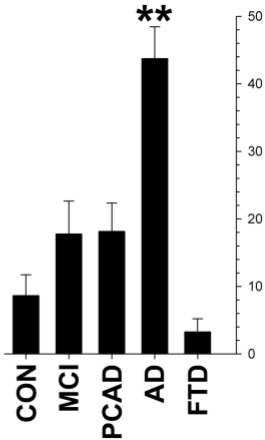

Supplement: mmc4.pdf [file mmc4.pdf]

**A**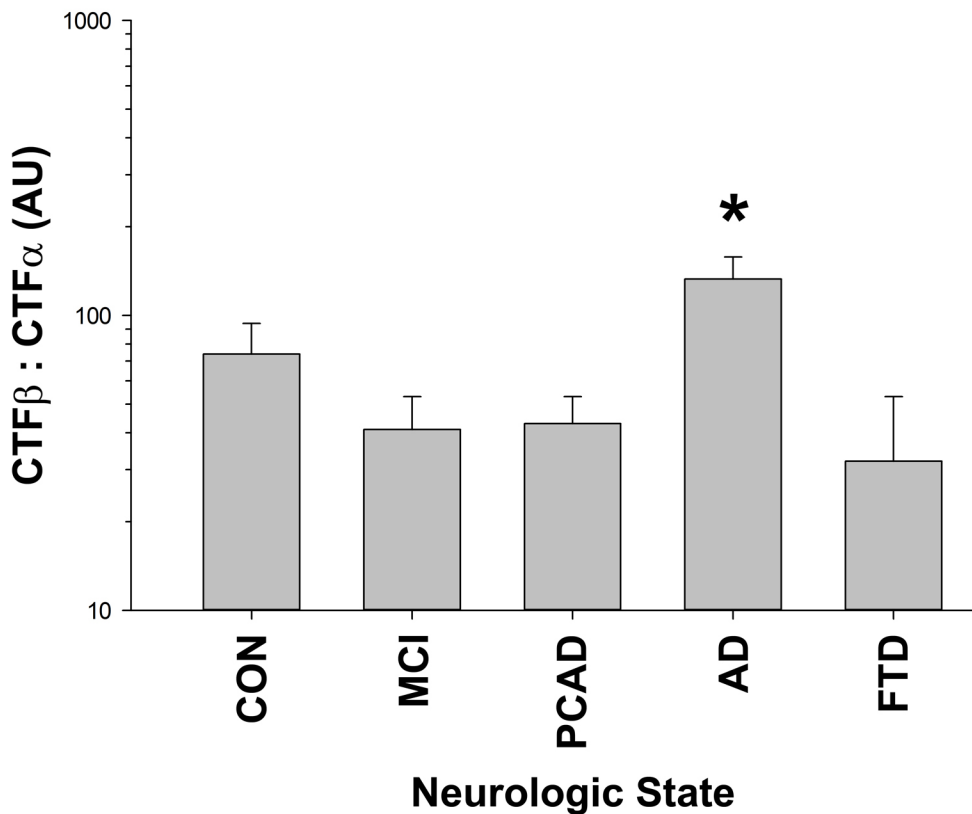**B**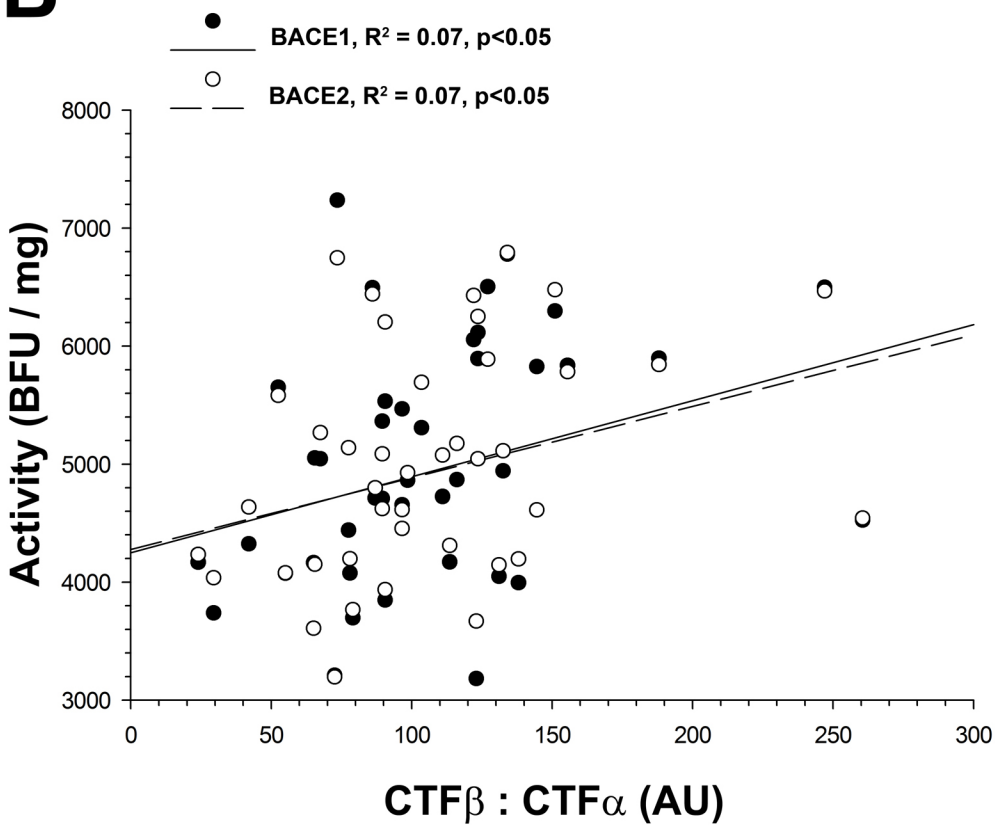

Supplement: mmc5.pdf [file mmc5.pdf]

**A**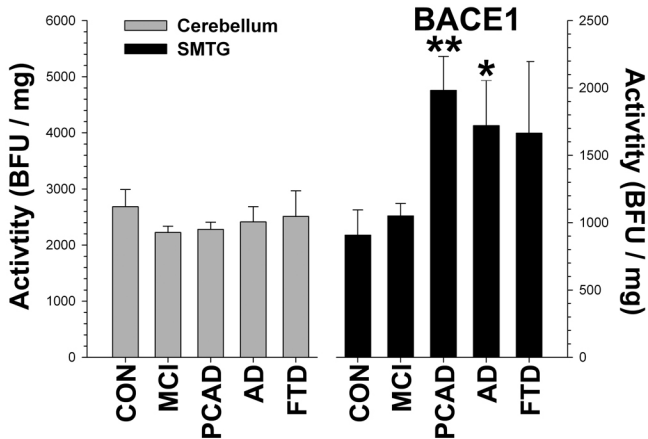**B**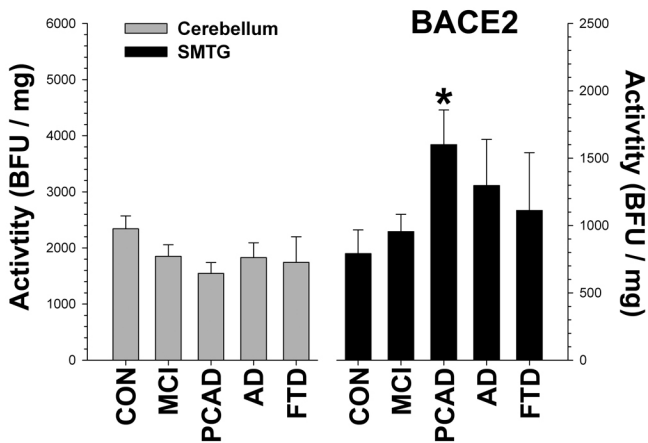

Supplement: mmc6.pdf [file mmc6.pdf]

**A**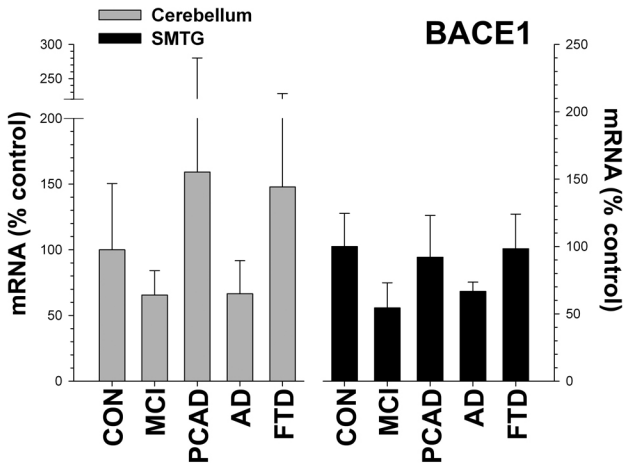**B**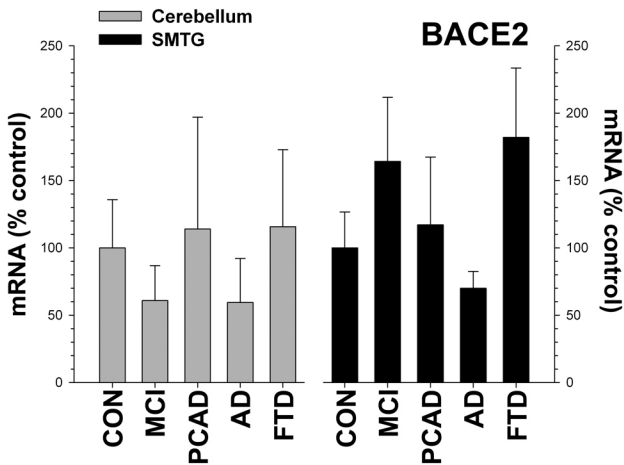

Supplement: mmc7.pdf [file mmc7.pdf]

**BACE2:GAPDH**

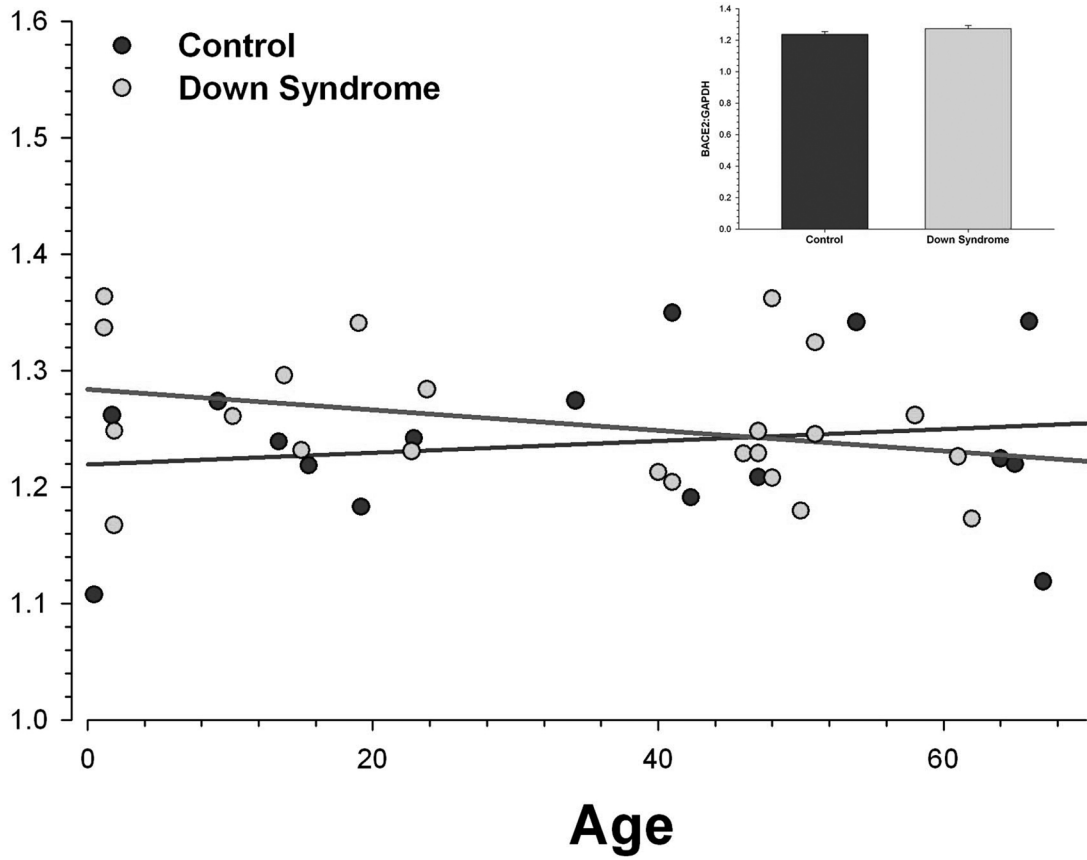

Supplement: mmc8.pdf [file mmc8.pdf]

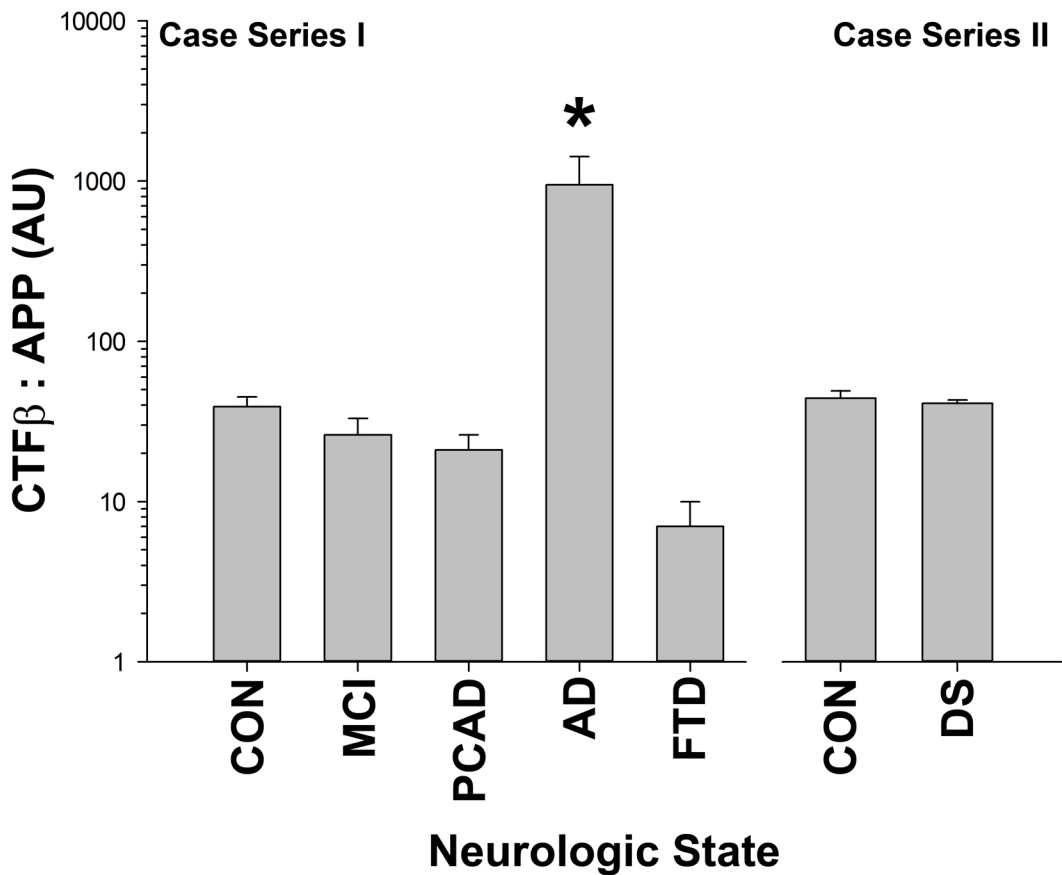

Supplement: mmc9.pdf [file mmc9.pdf]
